# Supplementary material for: Sediment potentially controls in-lake phosphorus cycling and harmful cyanobacteria in shallow, eutrophic Utah Lake
Source: PLoS One. 2019 Feb 14;14(2):e0212238. doi: 10.1371/journal.pone.0212238 (PMC6375609; doi:10.1371/journal.pone.0212238)
Supplement: S5 Table — (XLSX) [file pone.0212238.s007.xlsx]

## Sheet: S5
S5 Table. Pore water chemistry.
					UTM Coordinates			Major ion concentrations (mg/L)									Filtered trace/minor element concentrations (mg/L)
Sample Location	Sample ID	Lab ID	Sample Date	Time	Zone	Easting	Northing	Ca	K	Mg	Na	F	Cl	NO3	HPO4	SO4	As	Ba	Fe	Mn	Mo	TDP	Si	Sr	V
Provo Bay 1	1-A	12246	2015-10-22	13:40:00	12T	440709	4448730	68.73	7.635	59.9601	121.567	0.238	76.1204	<0.1	2.2155	78.0446	0.0037	0.0412	0.022	0.0551	<0.001	4.08086	15.4748	0.8875	0.0011
Utah Lake 1	2-A	12247	2015-10-22	14:20:00	12T	433660	4453585	38.78	21.24	122.131	299.409	0.6159	443.88	<0.1	0.339	317.405	0.0436	0.0523	0.0174	0.0551	0.0062	0.6187	14.7757	1.36083	<0.001
Utah Lake 2	3-A	12248	2015-10-22	15:10:00	12T	430545	4456089	37.69	20.32	117.319	289.508	0.6004	422.892	<0.1	0.299	296.054	0.0464	0.0525	0.0158	0.0434	0.0066	0.5937	13.3487	1.28141	<0.001
Lindon Marina	4-B	12611	2016-05-24	10:00:00	12T	434812	4464328	66.35	16.51	57.13	170.4	0.476	261.755	<0.1	<0.1	1795.05	0.0246	0.0916	0.2367	0.1563	0.0026	4.062	16.79	1.62	0.0011
Lindon to Pelican 1/4	5-B	12612	2016-05-24	10:40:00	12T	432604	4463446	60.79	25.54	64.52	240.7	0.448	375.89	0.421	<0.1	1015.25	0.0428	0.1056	0.0071	0.0406	0.007	0.642	12.27	1.464	0.0011
Lindon to Pelican 1/2	6-B	12613	2016-05-24	11:10:00	12T	430419	4462602	60.02	26.53	64.92	247.9	0.51	382.417	0.391	<0.1	1397.37	0.0453	0.1074	0.0065	0.0374	0.0095	0.6726	12.09	1.485	<0.001
Lindon to Pelican 3/4	7-B	12614	2016-05-24	11:30:00	12T	428348	4461778	56.46	24.81	52.06	234.7	0.478	363.938	0.223	<0.1	1025.18	0.0379	0.109	0.0049	0.0335	0.0082	0.7044	13.5	1.67	<0.001
Pelican Bay	8-B	12615	2016-05-24	12:00:00	12T	426157	4460386	75.54	25.83	56.04	250.4	0.4633	422.641	<0.1	<0.1	1350	0.0726	0.1216	0.2369	0.1265	0.0048	0.7518	15.55	2.422	<0.001
North Goose Point	9-B	12617	2016-06-01	12:00:00	12T	426537	4438435	53.77	21.91	75.88	233.5	0.4165	542	2.3471	<0.1	1147.15	0.0175	0.0437	0.0103	0.0069	0.0045	0.4033	9.825	1.505	0.0024
Goshen Bay	10-B	12616	2016-06-01	11:00:00	12T	424795	4433024	81.27	30.4	121.7	358.8	0.451	526.897	0.774	<0.1	196.833	0.075	0.0457	0.3411	0.0528	0.0073	0.4697	8.378	2.166	0.0026
1 Provo Bay	11-B	12618	2016-06-16	09:00:00	12T	442475	4449840	99.93	6.738	31.2632	43.1678	0.228	70.928	<0.1	1.034	826.79	0.0091	0.0577	0.0091	0.0503	0.0037	5.00957	9.87225	0.949	<0.001
2 Provo Bay	12-B	12619	2016-06-16	09:30:00	12T	441309	4449341	75.17	9.835	38.5886	58.8482	0.2682	125.726	0.7099	<0.1	1124.51	0.0085	0.0492	0.0325	0.1085	0.0012	4.64972	11.2541	0.9628	<0.001
3 Provo Bay	13-B	12620	2016-06-16	10:00:00	12T	437999	4448833	82.56	16.05	60.9479	141.121	0.305	321.62	2.915	<0.1	1166	0.0253	0.0811	0.0333	0.1011	0.0034	0.6621	11.4188	1.268	<0.001
Lindon Marina	4-C	13293	2016-08-31	08:25:00	12T	434812	4464328	71.85	15.13	101.193	169.79	0.6186	226.618	0.113	<0.1	792.235	0.0262	0.0784	0.1169	0.0848	0.0052	6.784	16.45	1.228	<0.001
Lindon to Pelican 1/2	6-C	13294	2016-08-31	09:00:00	12T	430419	4462602	55.02	23.915	110.021	335.514	0.4722	501.826	<0.1	<0.1	1127.49	0.0153	0.0835	0.0512	0.0392	0.0035	1.611	14.12	1.381	0.0015
Goshen Bay North	14-C	13295	2016-08-31	10:30:00	12T	425325	4442028	56.75	27.215	119.138	380.536	0.4922	611.153	<0.1	<0.1	1387.19	0.026	0.0972	0.0726	0.0371	0.0046	1.413	14.92	1.651	0.0021
2 Provo Bay	12-C	13296	2016-08-31	12:50:00	12T	441309	4449341	68.9	8	34.195	60.2	0.1728	63.3709	<0.1	<0.1	1217.21	<0.001	0.0543	0.0629	0.0645	<0.001	7.468	13.79	0.7436	0.0021
3 Provo Bay	13-C	13297	2016-08-31	13:30:00	12T	437999	4448833	48.86	11.325	43.7	97.35	0.257	122.193	<0.1	<0.1	951.109	0.0314	0.0484	0.0149	0.0416	0.007	1.237	8.454	0.8837	0.0031
4 Provo Bay	15-C	13298	2016-08-31	13:00:00	12T	439582	4447675	66.02	9.26	34.93	66.15	0.2066	96.126	<0.1	<0.1	1598.05	0.0066	0.0531	0.032	0.0537	0.002	3.056	9.259	0.8673	0.003
Lindon Marina	4-D	13299	2016-11-10	10:16:00	12T	434812	4464328	66.45	16.58	87.8741	167.94	0.5757	234.434	<0.1	<0.1	468.74	0.0201	0.0726	0.0593	0.0871	0.0056	2.061	9.73	1.094	0.0017
Lindon to Pelican 1/2	6-D	13300	2016-11-10	11:00:00	12T	430419	4462602	54.77	30.175	119.415	341.375	0.648	526.327	<0.1	<0.1	640.54	0.0408	0.0952	0.0202	0.0433	0.0082	0.9458	10.38	1.54	0.0026
Utah Lake 1	2-D	13301	2016-11-10	12:40:00	12T	433660	4453585	57.81	29.35	119.542	350.212	0.667	533.549	<0.1	0.17	605.842	0.0608	0.0966	0.0311	0.0771	0.0063	1.398	11.92	1.592	0.0014
Utah Lake 2	3-D	13302	2016-11-10	12:25:00	12T	430545	4456089	55.45	31.245	123.974	362.966	0.658	568.833	<0.1	<0.1	669.182	0.0273	0.0987	0.0115	0.0459	0.0085	0.5734	8.87	1.587	<0.001
1 Provo Bay	11-D	13303	2016-11-10	13:20:00	12T	442475	4449840	117.6	10.125	42.92	65.9	0.3728	100.198	<0.1	1.6583	442.437	0.0072	0.0422	0.137	0.0464	0.0015	10.82	8.729	1.46	<0.001
2 Provo Bay	12-D	13304	2016-11-10	13:05:00	12T	441309	4449341	101.2	9.4	40.24	54.9	0.2288	73.255	<0.1	<0.1	895.36	0.0094	0.0674	0.0121	0.0694	0.0032	1.301	5.873	1.046	0.0026
4 Provo Bay	15-D	13305	2016-11-10	14:00:00	12T	439582	4447675	86.93	10.02	41.745	67.1	0.2921	97.451	<0.1	<0.1	511.442	0.0091	0.0543	0.0104	0.0879	0.0026	0.2554	4.857	1.083	0.0002
